# Supplementary figures and images for: Agent-based learning of materials datasets from the scientific literature
Source: Royal Society of Chemistry journal article supplement (doi:10.1039/d4dd00252k), 2024-01-01

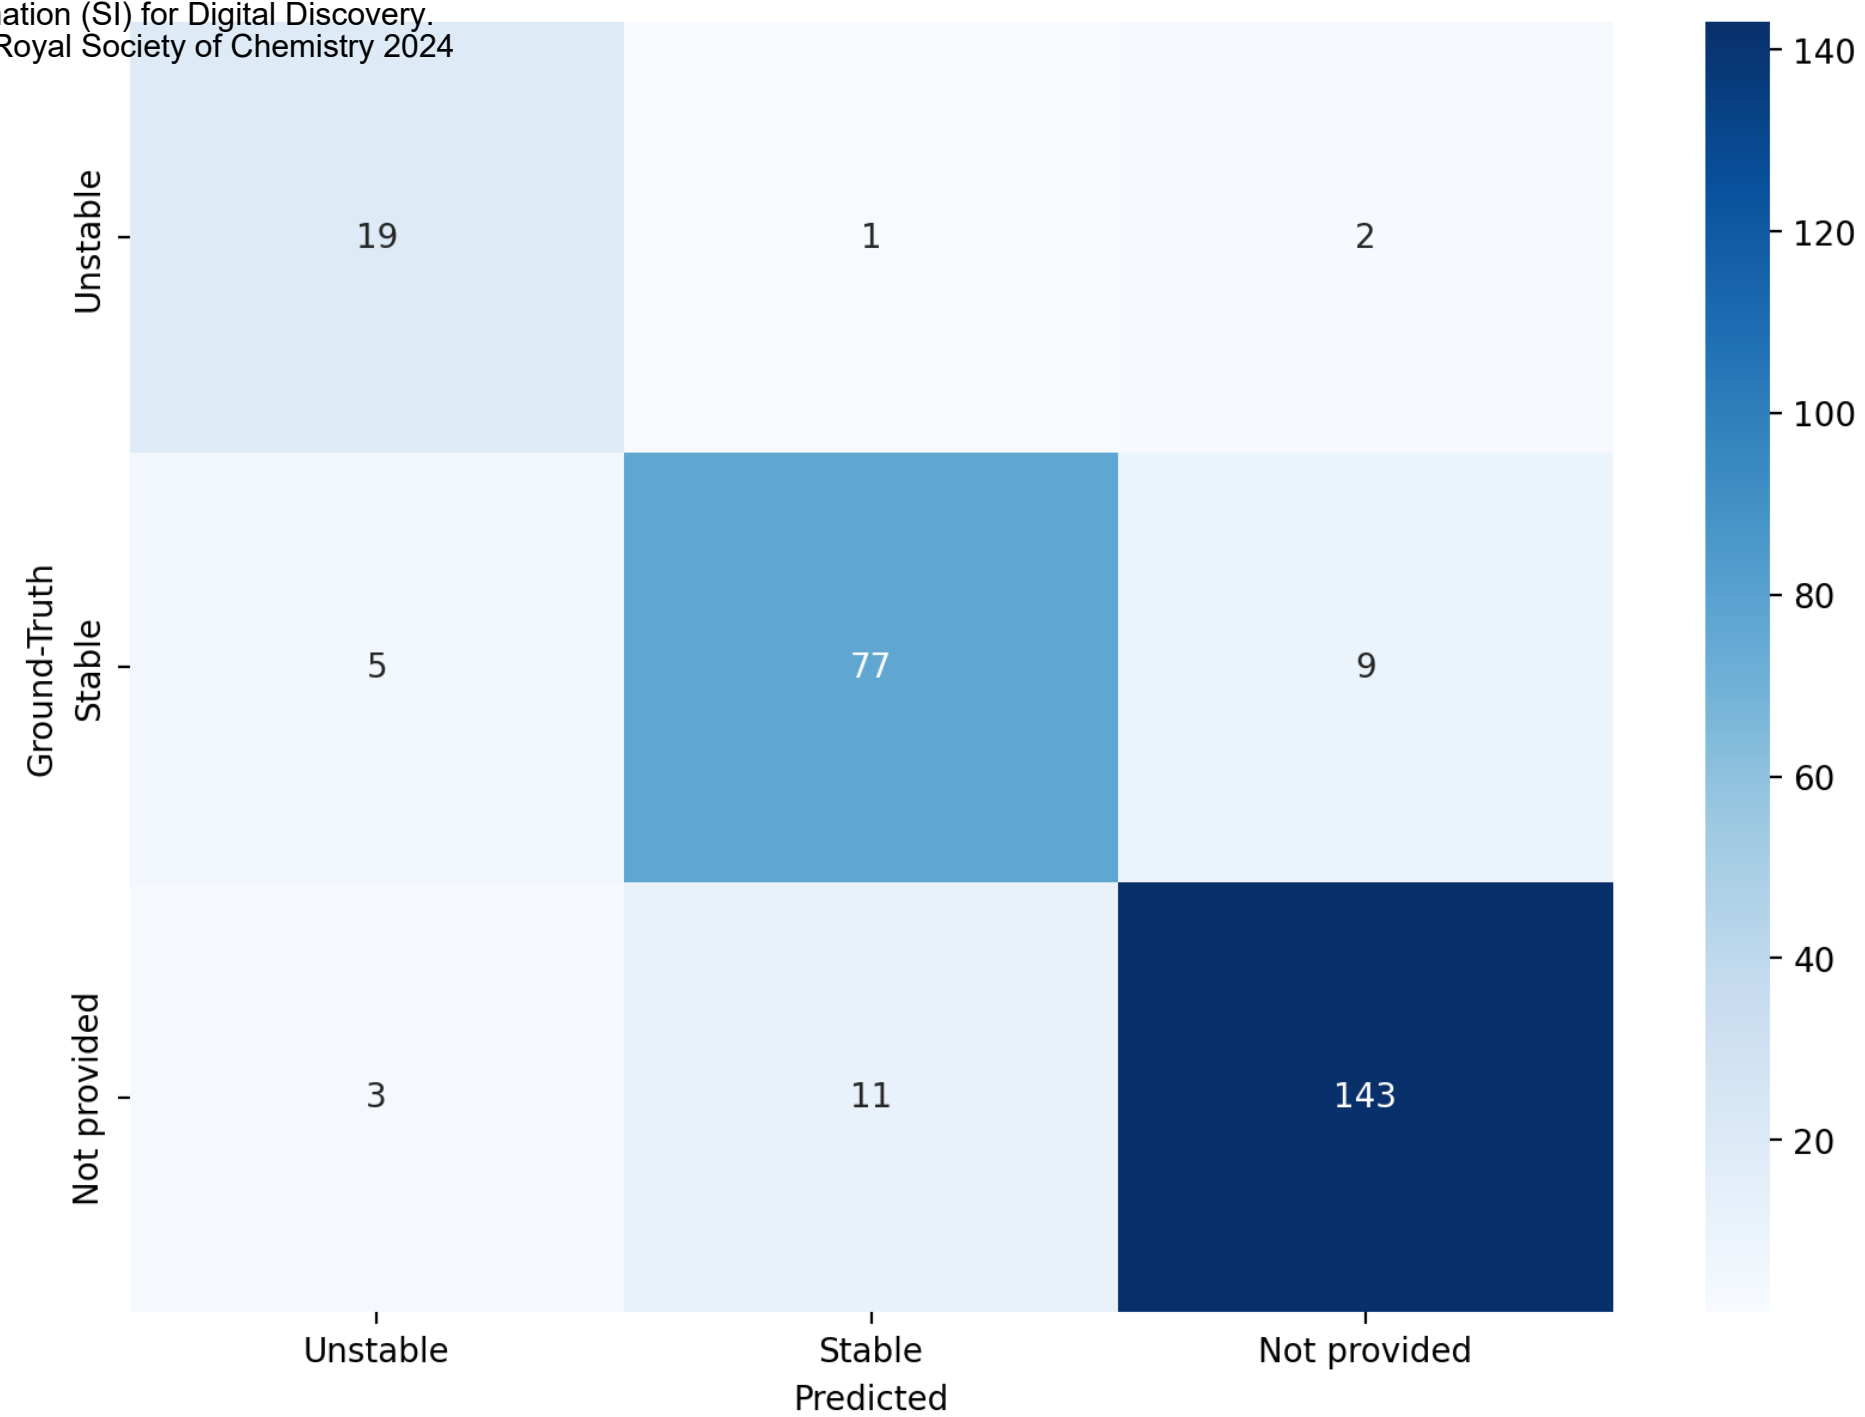

Supplement: d4dd00252k1.pdf [file d4dd00252k1.pdf]
